# Supplementary material for: Light Supplementation in Pitaya Orchards Induces Pitaya Flowering in Winter by Promoting Phytohormone Biosynthesis
Source: MDPI journal article supplement (doi:10.3390/ijms25094794), 2024-04-27
Supplement: s1 [file s1]

A

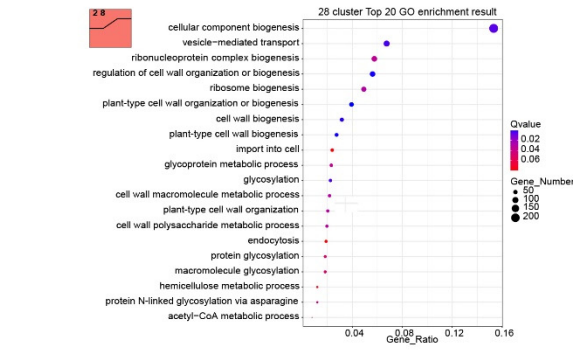

B

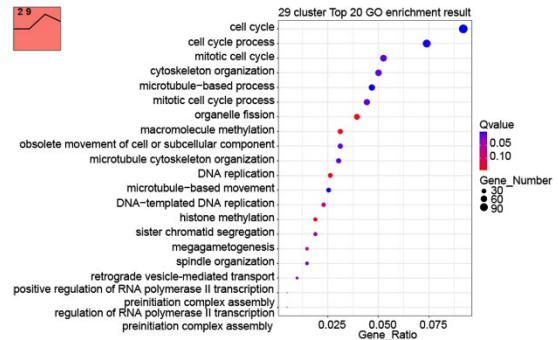

C

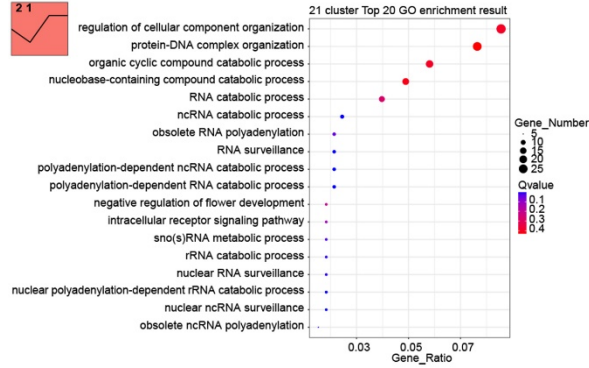

D

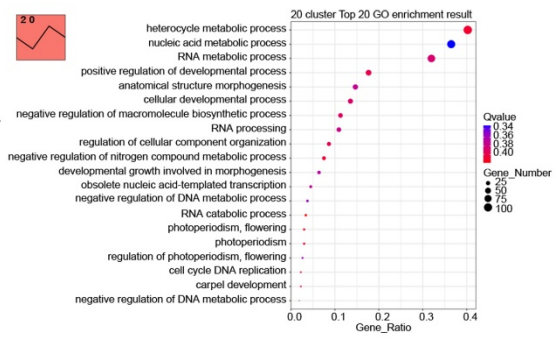

E

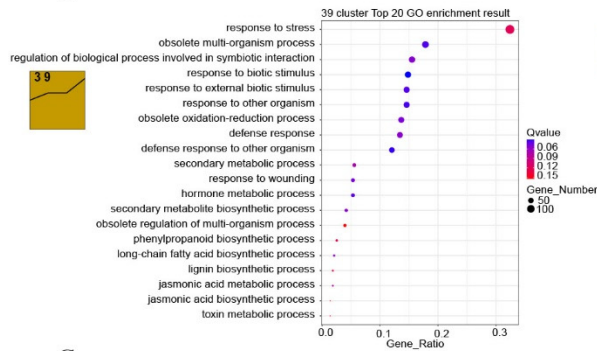

F

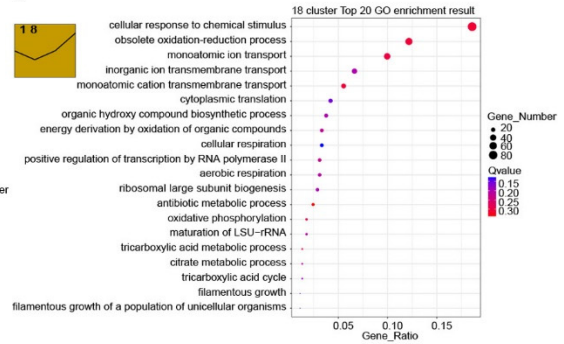

G

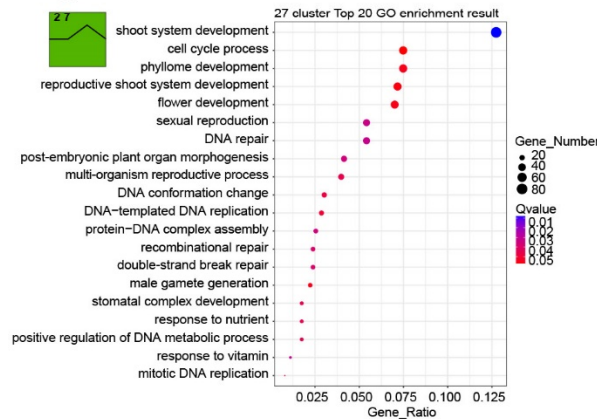

H

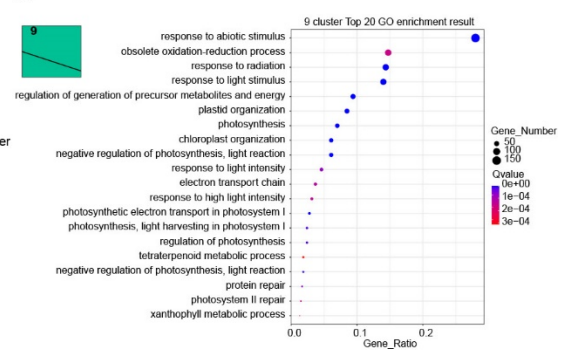

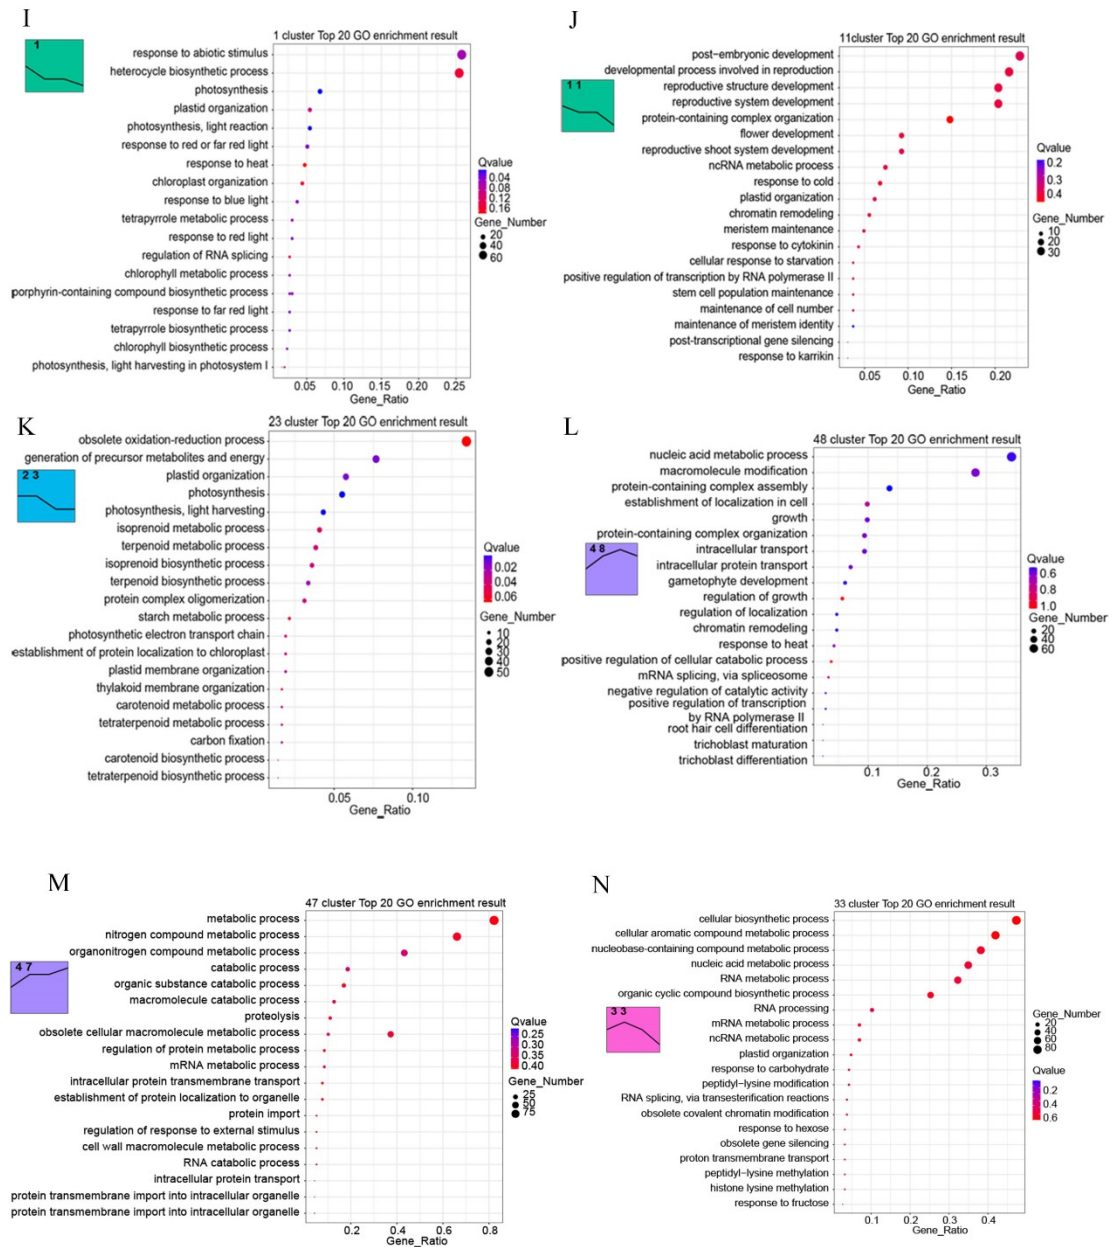

Figure S1 A-D: GO enrichment analysis of clusters 28, 29, 21, and 20; E-H: GO enrichment analysis of clusters 39, 18, 27, and 9; I-L: GO enrichment analysis of clusters 1, 11, 23, and 48; M-N: GO enrichment analysis of clusters 47 and 33.
