# Supplementary material for: Light Supplementation in Pitaya Orchards Induces Pitaya Flowering in Winter by Promoting Phytohormone Biosynthesis
Source: Int J Mol Sci. 2024 Apr 27;25(9):4794. doi: 10.3390/ijms25094794 (PMC11083671; doi:10.3390/ijms25094794)
Supplement: Supplementary file 1 [file ijms-25-04794-s001.zip › Table. S1.xlsx]

## Sheet: Sheet1
Table S1. Primer sequences were used for this study.
Primer name	Primer sequence
Unigene0031013 F	TTTTGTTTGTTGGGTTCGTT
Unigene0031013 R	CTGTTTTCAAGCCTCTGCC
Unigene0040494 F	CGAGGATAGCAGGGACAAC
Unigene0040494 R	CTTTTACTACCAGAGACGGCA
Unigene0004845 F	GTTCTTCCCAACTTGCGAC
Unigene0004845 R	CCATCATAAACTGCCTCTGC
Unigene0038692 F	TGAACGAGGCGATAAGATAGA
Unigene0038692 R	CAATGGCAAGATGAGTAGGTG
Unigene0027944 F	ACCATTCCATCCTCACCACT
Unigene0027944 R	TCTTCACAATAACCAAC CCTTC
Unigene0046182 F	CAGTATCGTGGGTTTGTGGC
Unigene0046182 R	TGGTTCGCTTCCTGCTCG
Unigene0022711 F	GAGAAGGTCAACCGCATAGG
Unigene0022711 R	CAAGAGATCCGCCATCCA
Unigene0049406 F	TTCCGATGTTACTTGTCCGT
Unigene0049406 R	ATCACTGTAGGCGCTGCTC
Unigene0030294 F	CCACTTGCTTCTCATTCCAG
Unigene0030294 R	TTTCCGTTCTTACCGCCT
unigene0034887 F	TGGAGTCACTACTGGCTTCG
unigene0034887 R	GCTCTGATTCTGCTCGCTT
unigene0031344 F	ATCTCTTCCTTGATTTCAGCAC
unigene0031344 R	TTCGGATACACTTGTCG TCTC
Unigene0047809 F	GAGCAGACTCAAGTGAAGAAGC
Unigene0047809 R	TGTTAAGAAGTATCGAG GCATG
Unigene0002444 F	ATGCCTTGGAGAGTGAGTTAGC
Unigene0002444 R	TCAGTTTGGGTCGGGTTG
unigene0044913 F	TTTGCCCACTGCTCTTCC
unigene0044913 R	GCTCCACATCCTTCGCTG
Unigene0052429 F	TGGCATCATCCTCGTTTACC
Unigene0052429 F	CACGGTGCTTCACGCTCT
Unigene0028447 F	TTTTCTTATTCCCTTCGCTG
Unigene0028447 R	GCTAACACTCTCTGGTC GCA
Unigene0003051 F	GCCTTTCTCTCTCTAACCCCA
Unigene0003051 R	TTCATCCCTGCTCTTTCCAT
Unigene0032463 F	AACGGTTCCTACACCTGCG
Unigene0032463 R	GCCAAGAACGCTTCGGT AA
Unigene0046679 F	GACGACGCTGAAGCCGCAT
Unigene0046679 R	GGAGCCCGAAATCAAGACC
Unigene0046377 F	GATGTATGACAAACAGTGGCG
Unigene0046377 R	TATCAGTGTGAAGGAAGGCAG
